# Supplementary material for: Association between Frequency of Conversations and Suicidal Ideation among Medical Students during COVID-19 Pandemic in Japan
Source: MDPI journal article supplement (doi:10.3390/ijerph19116385), 2022-05-24
Supplement: s1 [file s1]

**Supplementary Table S1.** Results of Poisson regression analysis about the prevalence of suicidal thoughts.

|                                             |                                                                                 |  | Model 1 |             |         | Model 2 |             |         |
|---------------------------------------------|---------------------------------------------------------------------------------|--|---------|-------------|---------|---------|-------------|---------|
|                                             |                                                                                 |  | PR      | 95% CI      | p-value | PR      | 95% CI      | p-value |
| Frequency of conversations                  | 3 times per week or more                                                        |  | ref.    |             |         | ref.    |             |         |
|                                             | 1 to 2 times per week                                                           |  | 0.52    | 0.06, 4.02  | 0.53    | 0.77    | 0.08, 6.79  | 0.82    |
|                                             | Less than 1 time per week or none                                               |  | 3.76    | 1.29, 10.94 | 0.01    | 7.6     | 1.84, 31.42 | <0.01   |
| Gender                                      | Male (ref.: Female)                                                             |  | 1.27    | 0.42, 3.83  | 0.66    | 1.43    | 0.43, 4.73  | 0.55    |
| Time of admission to medical school         | Immediately after graduating from high school                                   |  | ref.    |             |         | ref.    |             |         |
|                                             | Taking 1 or 2 years after graduating from high school to pass the entrance exam |  | 0.84    | 0.26, 2.66  | 0.77    | 1.18    | 0.32, 4.34  | 0.8     |
|                                             | After graduating from another university                                        |  | 0.87    | 0.24, 3.13  | 0.84    | 0.99    | 0.21, 4.50  | 0.99    |
| Personality traits                          | Extraversion                                                                    |  |         |             |         | 1.14    | 0.94, 1.39  | 0.16    |
|                                             | Agreeableness                                                                   |  |         |             |         | 0.96    | 0.73, 1.26  | 0.79    |
|                                             | Neuroticism                                                                     |  |         |             |         | 1.22    | 0.97, 1.52  | 0.07    |
|                                             | Conscientiousness                                                               |  |         |             |         | 1.05    | 0.85, 1.28  | 0.63    |
|                                             | Openness                                                                        |  |         |             |         | 0.98    | 0.79, 1.22  | 0.89    |
| Living alone                                | Yes (ref.: No)                                                                  |  |         |             |         | 0.82    | 0.25, 2.62  | 0.74    |
| Unsatisfactory family relationship          |                                                                                 |  |         |             |         | 1.61    | 0.94, 2.75  | 0.07    |
| Number of friends in medical school         |                                                                                 |  |         |             |         | 0.93    | 0.81, 1.07  | 0.35    |
| Number of friends outside of medical school |                                                                                 |  |         |             |         | 1.02    | 0.97, 1.08  | 0.36    |
| Perceived level of personal income          |                                                                                 |  |         |             |         | 1.17    | 0.65, 2.10  | 0.59    |

PR: prevalence ratio, CI: confidence interval, ref.: reference.

Regarding the frequency of conversations, "less than 1" and "none" were combined into a single category. Results were adjusted for gender and age (as the time of admission to medical school) in model 1, and for personality traits, living alone, family relationship, number of friends, and perceived level of personal income in addition to gender, and age in model 2.

**Supplementary Table S2.** Results of linear regression analysis about total score for suicidal thoughts.

|                                             |                                                                                 |  | Model 1 |             |         | Model 2 |             |         |
|---------------------------------------------|---------------------------------------------------------------------------------|--|---------|-------------|---------|---------|-------------|---------|
|                                             |                                                                                 |  | Coef.   | 95% CI      | p-value | Coef.   | 95% CI      | p-value |
| Frequency of conversations                  | 3 times per week or more                                                        |  | ref.    |             |         | ref.    |             |         |
|                                             | 1 to 2 times per week                                                           |  | 0.01    | -1.52, 1.55 | 0.53    | 0.17    | -1.47, 1.82 | 0.83    |
|                                             | Less than 1 time per week or none                                               |  | 3.59    | 1.85, 5.33  | <0.01   | 3.75    | 1.91, 5.58  | <0.01   |
| Gender                                      | Male (ref.: Female)                                                             |  | 0.30    | -0.72, 1.33 | 0.56    | 0.30    | -0.77, 1.38 | 0.58    |
| Time of admission to medical school         | Immediately after graduating from high school                                   |  | ref.    |             |         | ref.    |             |         |
|                                             | Taking 1 or 2 years after graduating from high school to pass the entrance exam |  | -0.58   | -1.86, 0.68 | 0.36    | -0.35   | -1.66, 0.95 | 0.59    |
|                                             | After graduating from another university                                        |  | -0.19   | -1.59, 1.21 | 0.78    | 0.03    | -1.42, 1.50 | 0.95    |
| Personality traits                          | Extraversion                                                                    |  |         |             |         | -0.02   | -0.23, 0.16 | 0.78    |
|                                             | Agreeableness                                                                   |  |         |             |         | -0.06   | -0.32, 0.21 | 0.65    |
|                                             | Neuroticism                                                                     |  |         |             |         | 0.16    | -0.02, 0.35 | 0.10    |
|                                             | Conscientiousness                                                               |  |         |             |         | 0.24    | 0.02, 0.45  | 0.02    |
|                                             | Openness                                                                        |  |         |             |         | 0.03    | -0.18, 0.27 | 0.75    |
| Living alone                                | Yes (ref.: No)                                                                  |  |         |             |         | -0.28   | -1.50, 0.92 | 0.63    |
| Unsatisfactory family relationship          |                                                                                 |  |         |             |         | 0.54    | 0.02, 1.05  | 0.04    |
| Number of friends in medical school         |                                                                                 |  |         |             |         | -0.06   | -0.55, 0.41 | 0.77    |
| Number of friends outside of medical school |                                                                                 |  |         |             |         | 0.05    | -0.14, 0.25 | 0.59    |
| Perceived level of personal income          |                                                                                 |  |         |             |         | 0.06    | -0.57, 0.69 | 0.85    |

Coef.: partial regression coefficient, CI: confidence interval, ref.: reference.

Regarding the frequency of conversations, "less than 1" and "none" were combined into a single category. Results were adjusted for gender and age (as the time of admission to medical school) in model 1, and for personality traits, living alone, family relationship, number of friends, and perceived level of personal income in addition to gender, and age in model 2.
